# Supplementary material for: Nitrogen Source Dependent Changes in Central Sugar Metabolism Maintain Cell Wall Assembly in Mitochondrial Complex I-Defective frostbite1 and Secondarily Affect Programmed Cell Death
Source: PubMed Central journal article supplement (PMC6121878; doi:10.3390/ijms19082206), 2018-07-28
Supplement: ijms-19-02206-s001.pdf [file ijms-19-02206-s001.pdf]

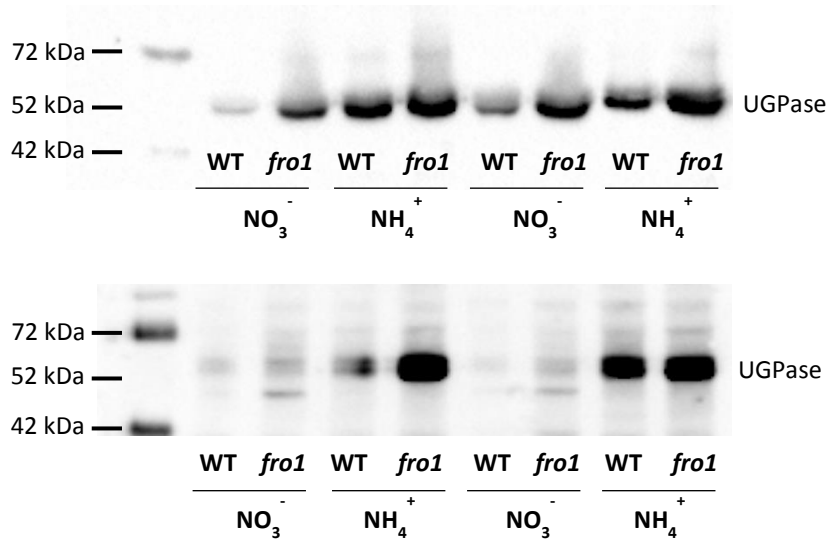

**Figure S1.** Protein level of UDP-glucose pyrophosphorylase (UGPase) in leaf tissue extracts of *frostbite1* (*fro1*) or wild-type (WT) *Arabidopsis* ecotype C24 plants cultured on  $\text{NH}_4^+$  and  $\text{NO}_3^-$  as the only nitrogen source. Four biological replicates of the blot presented on Figure 2 are shown.

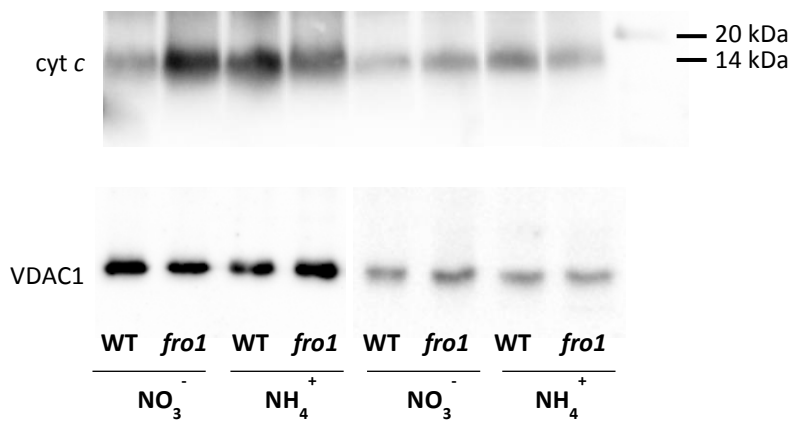

**Figure S2.** Cytochrome *c* (cyt *c*) protein level in mitochondria isolated from leaves of *frostbite1* (*fro1*) or wild-type (WT) *Arabidopsis* ecotype C24 plants cultured on  $\text{NH}_4^+$  and  $\text{NO}_3^-$  as the only nitrogen source. Two biological replicates of the blot presented on Figure 7 are shown. Mitochondrial porin VDAC1 was used for protein level normalization.

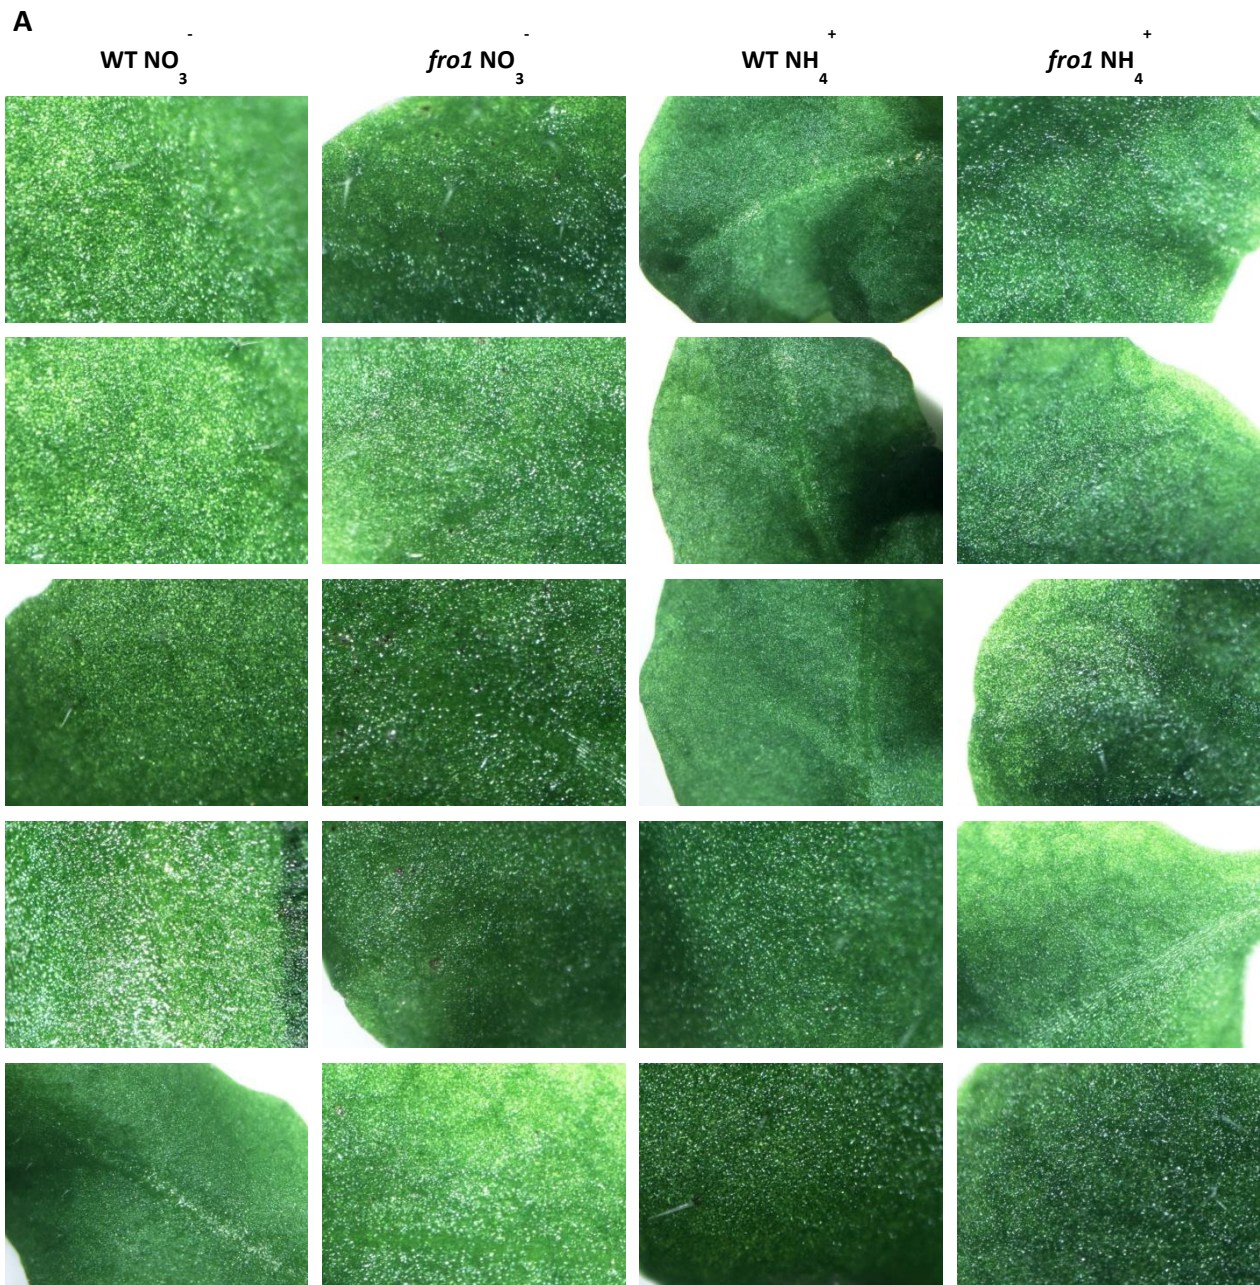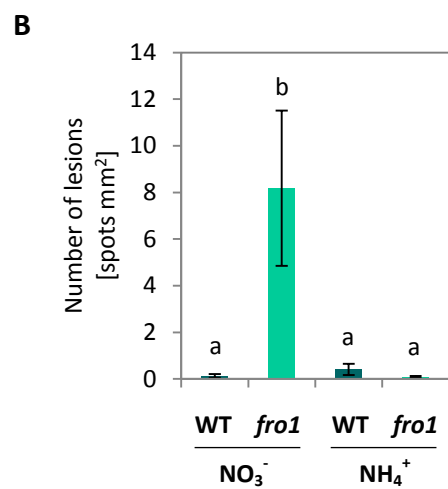

**Figure S3.** Lesions on leaves of *frostbite1* (*fro1*) or wild-type (WT) *Arabidopsis* ecotype C24 plants cultured on NH<sub>4</sub><sup>+</sup> and NO<sub>3</sub><sup>-</sup> as the only nitrogen source. (A) Visualization of five biological replicates additional to the results presented on Figure 6. (B) Quantification of lesions on six representative leaves.

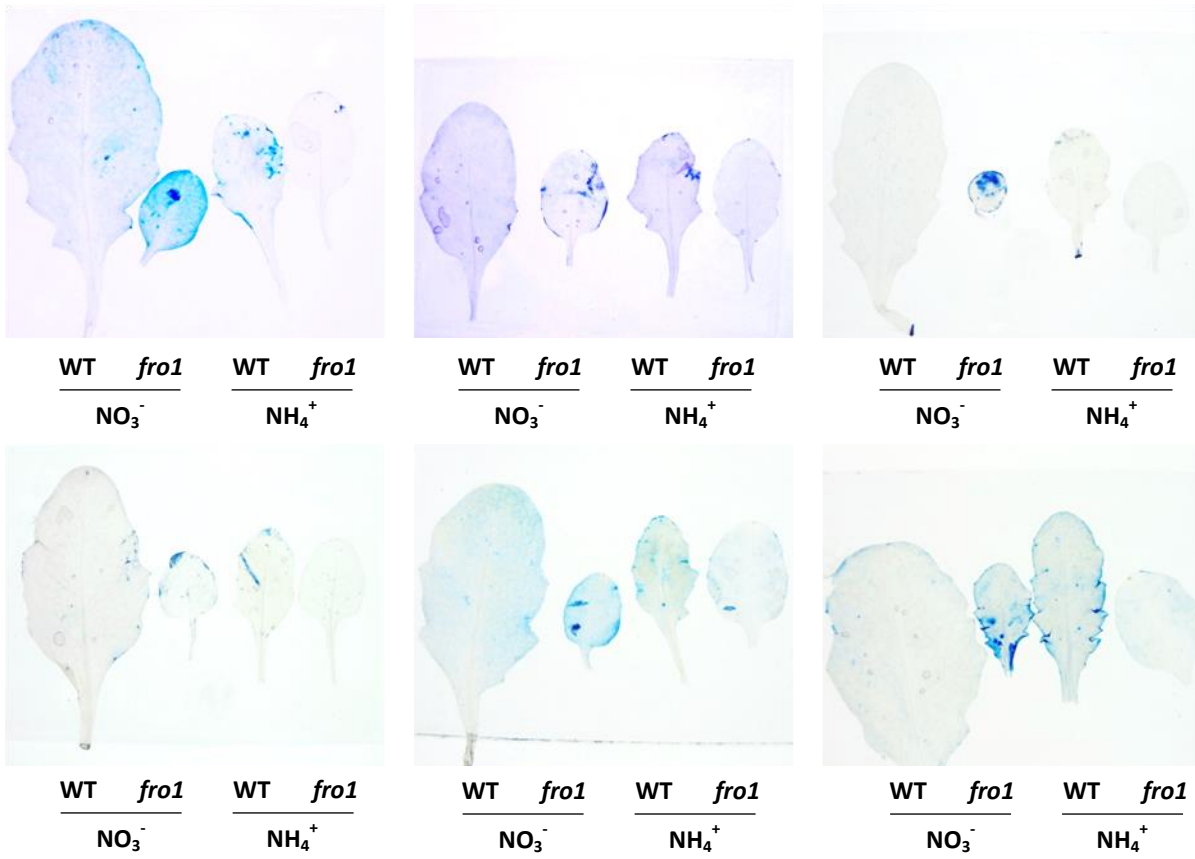

**Figure S4.** Necrosis development on leaves of *frostbite1* (*fro1*) or wild-type (WT) *Arabidopsis* ecotype C24 plants cultured on  $\text{NH}_4^+$  and  $\text{NO}_3^-$  as the only nitrogen source. Six biological replicates of trypan blue staining additional to the results presented in Figure 6 are shown.

**Table S1.** List of qRT-PCR primers designed for this study.

| <b>Gene</b>           | <b>AGI identification</b> | <b>Forward Primer</b>              | <b>Reverse Primer</b>              |
|-----------------------|---------------------------|------------------------------------|------------------------------------|
| <b><i>ATG5</i></b>    | AT5G17290                 | 5'– TTCCTGTTCCGGTTGTATGTTCCG – 3'  | 5'– TCTTTCTTCACCACTCGTTTGC – 3'    |
| <b><i>BI-1</i></b>    | AT5G47120                 | 5'– ATGTCCTCCTTATGAACACCAAA – 3'   | 5'– CAAGCCAGATGAAAGCAGTCC – 3'     |
| <b><i>CAD1</i></b>    | AT1G72680                 | 5'– CTTGGTATGAGAATGCTCGCTG – 3'    | 5'– TGGGAATCACCTCTATGTTTGG – 3'    |
| <b><i>CAD4</i></b>    | AT3G19450                 | 5'– CCTATGGTTCCTGGGCACG – 3'       | 5'– CGACTCCGACTACATCTCCTACG – 3'   |
| <b><i>CAD5</i></b>    | AT4G34230                 | 5'– GCTTGGGAGGAAAAGTGATAACG – 3'   | 5'– CGAGTCTCTCAAACGCAGTGT – 3'     |
| <b><i>CesA1</i></b>   | AT4G32410                 | 5'– CATA CGGTTTCTGGAGAGATTCCG – 3' | 5'– GACCCAAAGGACCTGATGTAGTTC – 3'  |
| <b><i>CesA3</i></b>   | AT5G05170                 | 5'– CGAGCAGACAAGATACTTCAGGAG – 3'  | 5'– AGATACAGAGAGGGCGTTCAGGTG – 3'  |
| <b><i>CesA4</i></b>   | AT5G44030                 | 5'– GATGATTCAGGTGTATCTCGGCA – 3'   | 5'– GTAACCAGGACGCTTCTCTCTTG – 3'   |
| <b><i>CesA6</i></b>   | AT5G64740                 | 5'– TAAAGGAAGTCCAAGAGTTGAAGGT – 3' | 5'– TGCGACGAGAGATTGACATACC – 3'    |
| <b><i>CesA7</i></b>   | AT5G17420                 | 5'– CAGCCCTTGAGGAGCAGA – 3'        | 5'– CAAAGTTGAGGTTACAAAGATGGAT – 3' |
| <b><i>CesA8</i></b>   | AT4G18780                 | 5'– GGAAGATACGCCACCGAACA – 3'      | 5'– TAGGAATCACAACCGAAAGCAC – 3'    |
| <b><i>HXK1</i></b>    | AT4G29130                 | 5'– CGAAGAAGCAGTTGGACAAGATG – 3'   | 5'– ATGGAAGATGTGATGACCTGAAGTT – 3' |
| <b><i>OZF1</i></b>    | AT2G19810                 | 5'– GCCGTCGTGTTTGTTCCTTG – 3'      | 5'– CCCAGATTAGACCCGAGTGA – 3'      |
| <b><i>POX33</i></b>   | AT3G49110                 | 5'– TGACTGCTTTGTTAATGGTTGTGA – 3'  | 5'– ACTGGAATCCTCGGGCTG – 3'        |
| <b><i>POX34</i></b>   | AT3G49120                 | 5'– GCTTTGTTAATGGTTGTGACGCA – 3'   | 5'– GGAAATCCCCGAGCCGAA – 3'        |
| <b><i>POX64</i></b>   | AT5G42180                 | 5'– TGTTGCTCTCTCTGGAGGTCAT – 3'    | 5'– GAGGGGTTTAGTGTGGGTCA – 3'      |
| <b><i>POX72</i></b>   | AT5G66390                 | 5'– GACTGTTTCGTC AAGGGATGTG – 3'   | 5'– GGCTGAGTTTCTGTTAGGGTTT – 3'    |
| <b><i>SnRK1.1</i></b> | AT3G01090                 | 5'– CTCAGTCTCGGGCTCATCC – 3'       | 5'– CGTCTCAAAGTAGTTGTTATCGTG – 3'  |
